# Supplementary material for: Electrocatalytic water oxidation studies of a tetranuclear Cu(ii) complex with cubane-like core Cu4(μ3-O)4
Source: Royal Society of Chemistry journal article supplement (doi:10.1039/c8nj06263c), 2019-01-01
Supplement: c8nj06263c1.pdf [file c8nj06263c1.pdf]

**Electrocatalytic water oxidation studies of a tetranuclear Cu(II) complex with  
cubane-like core  $\text{Cu}_4(\mu_3\text{-O})_4$**

Wei-Song Gao, Jin-Miao Wang, Ning-Ning Shi, Chang-Neng Chen, Yu-Hua  
Fan\*, Mei Wang\*

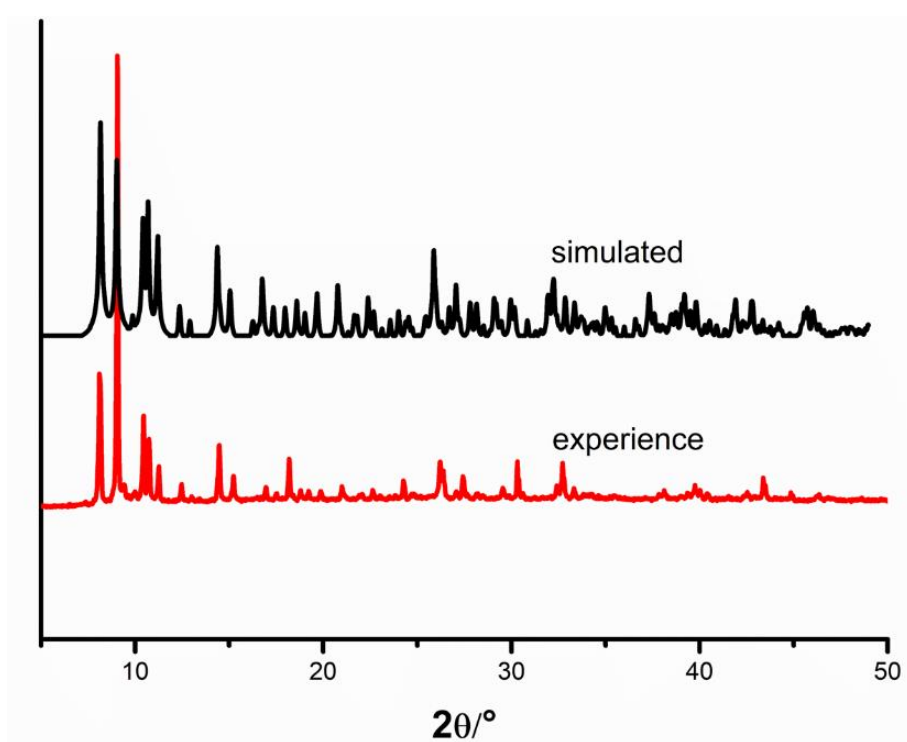

**Fig. S1.** Experimental (red) and theoretical (black) powder X-ray diffraction (PXRD) patterns of complex **1**.

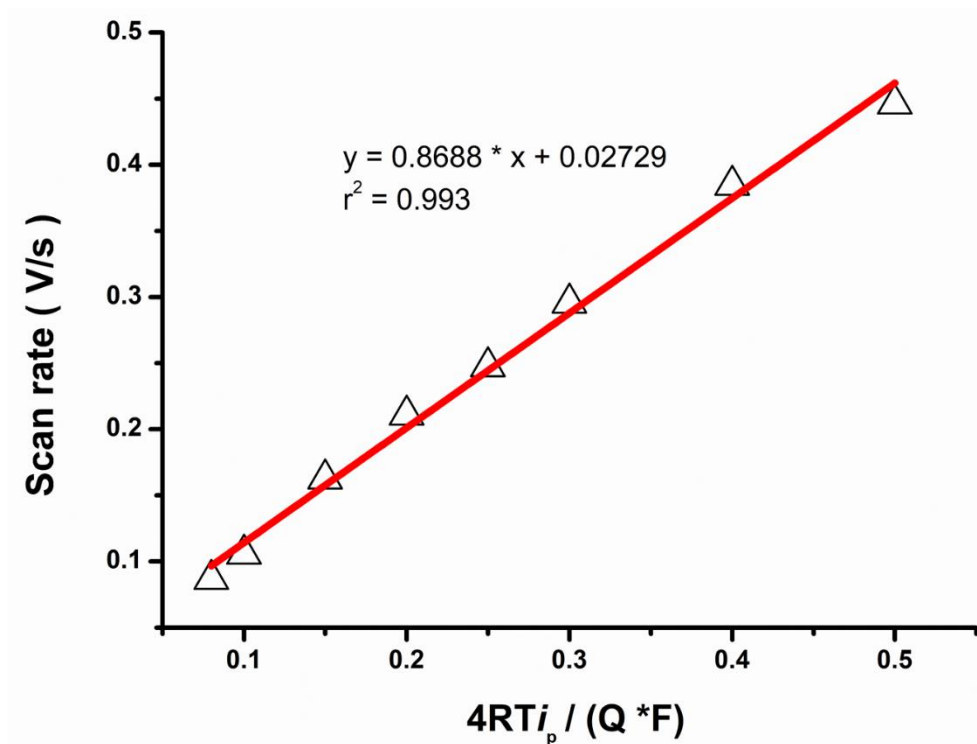

**Fig. S2.** The linear plot of scan rate versus  $\frac{4RTi_p}{FQ}$  for irreversible peak at  $E_p = 0.38$  V process for complex 1.

Laviron's Method for the calculation of the number of electrons involved in the anodic and cathodic irreversible processes:

$$i_p = \frac{nFQv}{4RT} \quad (\text{Equation 1})$$

$$v = \frac{1}{n} \times \frac{4RTi_p}{FQ} \quad (\text{Equation 2})$$

In the equation:

$i_p$  = peak current

$n$  = number of electrons transferred in the irreversible processes

$F$  = Faraday constant

$Q$  = quantity of electric charge

$v$  = scan rate

$R$  = ideal gas constant

T = temperature

It is found that  $v$  has linear relationship with  $\frac{4RTi_p}{FQ}$ . According to Equation 2, the slope (k) of the  $v$  vs  $\frac{4RTi_p}{FQ}$  plot is represented as:  $k = 1 / n$  (Equation 3), from which we can get n.

For complex **1**, the value of the slop  $k = 0.8688$  for the irreversible peak at  $E_p = 0.38$  V process can be obtained from figure S2. While, the k value for the peak at  $E_p = -0.80$  V process can be got as 0.8206 from figure S3. Accordingly, the number of electrons involved in the anodic and cathodic irreversible peaks can both be calculated as approximately one.

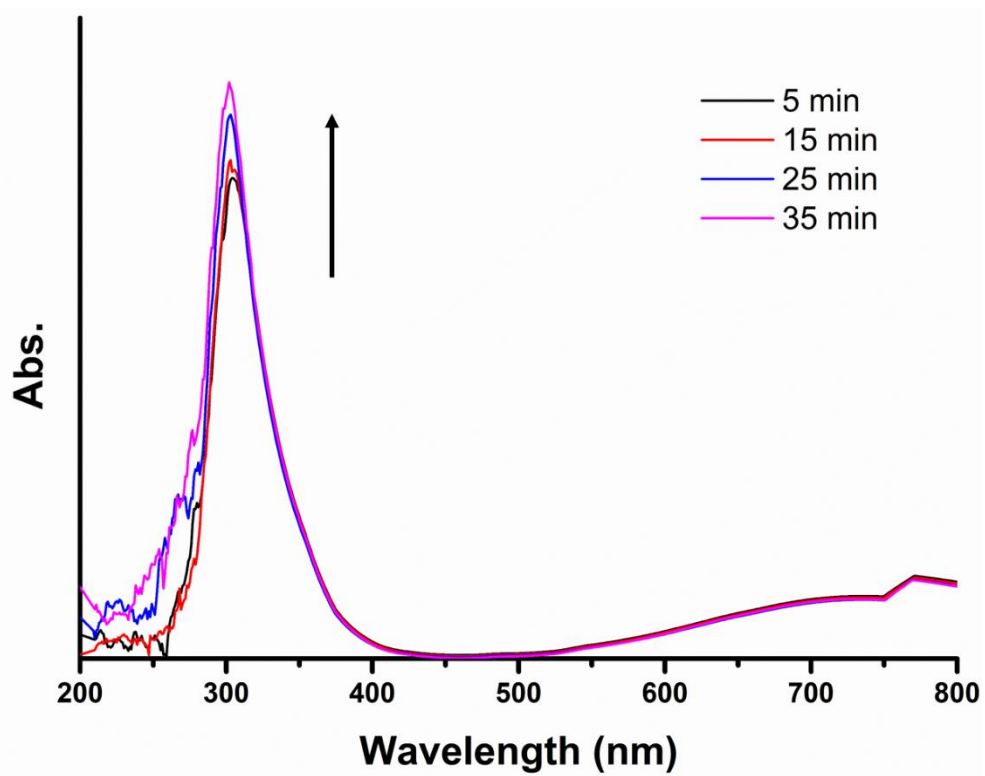

**Fig. S3.** The *in situ* UV-vis spectroelectrochemistry of complex **1** during the controlled potential electrolysis at 1.35 V

**Table S1.** Selected bond lengths (Å) and angles (°) for complex **1**.

|                         |            |              |            |
|-------------------------|------------|--------------|------------|
| Cu2—O1                  | 1.9404(15) | Cu1—O1(A)    | 1.9845(15) |
| Cu2—O3(A <sup>a</sup> ) | 1.9806(14) | Cu1—O3       | 1.9253(14) |
| Cu2—O5                  | 1.9717(15) | Cu1—O0AA     | 1.9627(15) |
| Cu2—O4                  | 2.3113(16) | Cu1—O2       | 2.3117(16) |
| Cu2—N2                  | 1.9835(18) | Cu1—N1       | 1.9655(18) |
| O3—Cu2(A)               | 1.9805(14) | O1—Cu1(A)    | 1.9845(15) |
|                         |            |              |            |
| O1(A)—Cu1—O2            | 92.09(6)   | O1—Cu2—O3(A) | 78.22(6)   |
| O3—Cu1—O1(A)            | 78.47(6)   | O1—Cu2—O5    | 95.62(6)   |
| O3—Cu1—O6               | 95.97(6)   | O1—Cu2—O4    | 112.84(6)  |
| O3—Cu1—O2               | 111.02(6)  | O1—Cu2—N2    | 167.84(6)  |
| O3—Cu1—N1               | 168.30(7)  | O3(A)—Cu2—O4 | 92.94(6)   |
| O0AA—Cu1—O1(A)          | 173.35(6)  | O3(A)—Cu2—N2 | 94.60(6)   |
| O0AA—Cu1—O2             | 93.33(6)   | O5—Cu2—O3(A) | 172.31(6)  |
| O0AA—Cu1—N1             | 90.37(7)   | O5—Cu2—O4    | 93.72(6)   |
| N1—Cu1—O1(A)            | 94.50(6)   | O5—Cu2—N2    | 90.66(7)   |
| N1—Cu1—O2               | 78.30(7)   | N2—Cu2—O4    | 77.02(6)   |

<sup>a</sup>Symmetry transformations used to generate equivalent atoms: A:  $-x + 1, y, -z + 3/2$ .
